# Supplementary material for: Quality indicators for knee and hip osteoarthritis care: a systematic review
Source: HighWire-hosted journal article supplement (doi:10.1136/rmdopen-2021-001590), 2021-05-01
Supplement: rmdopen-2021-001590supp001_data_supplement.pdf [file rmdopen-2021-001590supp001_data_supplement.pdf]

## Supplementary file 1: search strategy

### Embase

('knee osteoarthritis'/de OR 'hip osteoarthritis'/de OR osteoarthritis/de OR (osteoarthrit\* OR osteo-arthrit\* OR osteoarthros\* OR osteo-arthros\* OR (degenerat\* NEAR/3 (joint-disease\* OR arthrit\*)) OR ((knee OR hip OR knees OR hips) NEAR/6 (arthrosis\* OR arthroses\* OR arthrot\* OR oa)) OR (oa AND rheuma\*)):ab,ti) AND ('health care quality'/de OR 'total quality management'/de OR (((qualit\* OR process OR performance\* OR structure\* OR outcome\* ) NEAR/3 (indicator\* OR parameter\*)) OR ((qualit\*) NEAR/3 (care OR healthcare ) NOT 'quality of life')):ab,ti)

### Medline (Ovid)

(Osteoarthritis, Knee/ OR Osteoarthritis, Hip/ OR osteoarthritis/ OR (osteoarthrit\* OR osteo-arthrit\* OR osteoarthros\* OR osteo-arthros\* OR (degenerat\* ADJ3 (joint-disease\* OR arthrit\*)) OR ((knee OR hip OR knees OR hips) ADJ6 (arthrosis\* OR arthroses\* OR arthrot\* OR oa)) OR (oa AND rheuma\*)):ab,ti.) AND (Quality of Health Care/ OR Total Quality Management/ OR Quality Indicators, Health Care/ OR (((qualit\* OR process OR performance\* OR structure\* OR outcome\* ) ADJ3 (indicator\* OR parameter\*)) OR ((qualit\*) ADJ3 (care OR healthcare ) NOT quality of life)):ab,ti.)

### CINAHL EBSCOhost

(MH Osteoarthritis, Knee OR MH Osteoarthritis, Hip OR MH osteoarthritis OR TI (osteoarthrit\* OR osteo-arthrit\* OR osteoarthros\* OR osteo-arthros\* OR (degenerat\* N2 (joint-disease\* OR arthrit\*)) OR ((knee OR hip OR knees OR hips) N5 (arthrosis\* OR arthroses\* OR arthrot\* OR oa)) OR (oa AND rheuma\*)) OR AB (osteoarthrit\* OR osteo-arthrit\* OR osteoarthros\* OR osteo-arthros\* OR (degenerat\* N2 (joint-disease\* OR arthrit\*)) OR ((knee OR hip OR knees OR hips) N5 (arthrosis\* OR arthroses\* OR arthrot\* OR oa)) OR (oa AND rheuma\*)) AND (MH Quality of Health Care OR MH Quality Improvement OR TI (((qualit\* OR process OR performance\* OR structure\* OR outcome\* ) N2 (indicator\* OR parameter\*)) OR ((qualit\*) N2 (care OR healthcare ) NOT quality of life)) OR AB (((qualit\* OR process OR performance\* OR structure\* OR outcome\* ) N2 (indicator\* OR parameter\*)) OR ((qualit\*) N2 (care OR healthcare ) NOT quality of life)))

### Cochrane CENTRAL

((osteoarthrit\* OR osteo-arthrit\* OR osteoarthros\* OR osteo-arthros\* OR (degenerat\* NEAR/3 (joint-disease\* OR arthrit\*)) OR ((knee OR hip OR knees OR hips) NEAR/6 (arthrosis\* OR arthroses\* OR arthrot\* OR oa)) OR (oa AND rheuma\*)):ab,ti) AND (((qualit\* OR process OR performance\* OR structure\* OR outcome\* ) NEAR/3 (indicator\* OR parameter\*)) OR ((qualit\*) NEAR/3 (care OR healthcare ) NOT 'quality of life')):ab,ti)

**Web of science**

TS=((osteoarthritis\* OR osteo-arthritis\* OR osteoarthrosis\* OR osteo-arthritis\* OR (degenerat\* NEAR/2 (joint-disease\* OR arthritis\*)) OR ((knee OR hip OR knees OR hips) NEAR/5 (arthrosis\* OR arthroses\* OR arthrot\* OR oa)) OR (oa AND rheuma\*)) AND (((qualit\* OR process OR performance\* OR structure\* OR outcome\* ) NEAR/2 (indicator\* OR parameter\*)) OR ((qualit\*) NEAR/2 (care OR healthcare ) NOT "quality of life"))))

**Google scholar**

osteoarthritis|"osteo|degenerative arthritis|arthrosis|joint"|osteoarthrosis|"knee|hip|knees|hips arthrosis|arthroses|oa" "quality|process|performance|structure|outcome indicator|indicators|parameter|parameters"|"quality\*care|healthcare"

**Google**

osteoarthritis|"osteo|degenerative arthritis|arthrosis|joint"|osteoarthrosis|"knee|hip|knees|hips arthrosis|arthroses|oa" "quality|process|performance|structure|outcome indicator|indicators|parameter|parameters"|"quality\*care|healthcare" file-type:pdf

**Open Grey**

(osteoarthritis OR "degenerative arthritis") AND (quality ) AND (indicator OR indicators OR parameter OR parameters)

**Clinicaltrials.gov**

(osteoarthritis OR "degenerative arthritis") AND (quality ) AND (indicator OR indicators OR parameter OR parameters)

**WHO ictrp**

osteoarthritis AND quality AND indicator\* OR osteoarthritis AND quality AND parameter\* OR "degenerative arthritis" AND quality AND indicator\* OR "degenerative arthritis" AND quality AND parameter\* OR
