# Supplementary material for: Quality indicators for knee and hip osteoarthritis care: a systematic review
Source: HighWire-hosted journal article supplement (doi:10.1136/rmdopen-2021-001590), 2021-05-01
Supplement: rmdopen-2021-001590supp002_data_supplement.pdf [file rmdopen-2021-001590supp002_data_supplement.pdf]

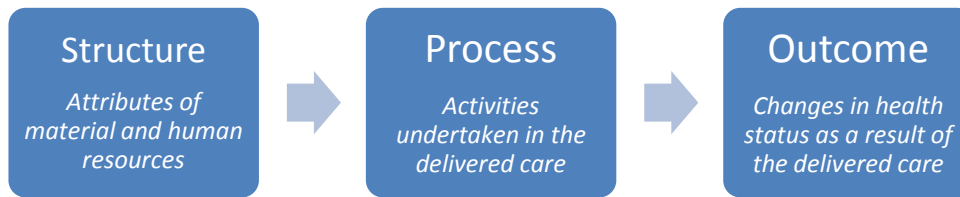

Figure 1. Donabedian's structure-process-outcome quality of care model
